# Supplementary material
Source: PubMed Central journal article supplement (PMC7336131)
Supplement: mmc1.pdf [file mmc1.pdf]

# THE LANCET

## Supplementary appendix

This appendix formed part of the original submission and has been peer reviewed.  
We post it as supplied by the authors.

Supplement to: Pollán M, Pérez-Gómez B, Pastor-Barriuso R, et al. Prevalence of SARS-CoV-2 in Spain (ENE-COVID): a nationwide, population-based seroepidemiological study. *Lancet* 2020; published online July 6. [http://dx.doi.org/10.1016/S0140-6736\(20\)31483-5](http://dx.doi.org/10.1016/S0140-6736(20)31483-5).

## **SUPPLEMENTARY MATERIAL**

Supplement to: Pollán M, Pérez-Gómez B, Pastor-Barriuso R, et al. Prevalence of SARS-CoV-2 in Spain (ENE-COVID): a nationwide, population-based seroepidemiological study. *Lancet* 2020.

| <b>Contents</b>        | <b>Page</b> |
|------------------------|-------------|
| ENE-COVID Study Group  | 2           |
| Supplementary Methods  | 6           |
| Supplementary Table 1  | 8           |
| Supplementary Table 2  | 9           |
| Supplementary Table 3  | 11          |
| Supplementary Table 4  | 12          |
| Supplementary Table 5  | 13          |
| Supplementary Table 6  | 14          |
| Supplementary Table 7  | 16          |
| Supplementary Table 8  | 17          |
| Supplementary Table 9  | 18          |
| Supplementary Figure 1 | 19          |
| Supplementary Figure 2 | 20          |
| Supplementary Figure 3 | 21          |

## ENE-COVID STUDY GROUP\*

\* Names listed alphabetically within each institution or autonomous community.

### Spanish Ministry of Health

**Faustino Blanco**, Secretario General de Sanidad, Ministerio de Sanidad, Madrid; **Rodrigo Gutiérrez Fernández**, Director General de Ordenación Profesional, Ministerio de Sanidad, Madrid; **Mariano Martín**, Subdirección de Tecnologías de la Información, Ministerio de Sanidad, Madrid; **Saturnino Mezcua Navarro**, Director de Programas, Gabinete Técnico Secretaría General de Sanidad, Ministerio de Sanidad, Madrid; **Marta Molina**, Secretaria General de Sanidad, Ministerio de Sanidad, Madrid; **Juan F. Muñoz-Montalvo**, Subdirección de Tecnologías de la Información, Ministerio de Sanidad, Madrid; **Matías Salinero Hernández**, Jefe de Servicio, Gabinete Técnico Secretaría General de Sanidad, Ministerio de Sanidad, Madrid; **Jose L. Sanmartín**, Subdirección de Tecnologías de la Información, Ministerio de Sanidad, Madrid.

### Institute of Health Carlos III

General Directorate: **Manuel Cuenca-Estrella**, Subdirector General de Servicios Aplicados, Formación e Investigación, Instituto de Salud Carlos III, Madrid; **Raquel Yotti**, Directora, Instituto de Salud Carlos III, Madrid.

General Secretariat: **José León Paniagua**, Secretaría General, Instituto de Salud Carlos III, Madrid.

National Center of Epidemiology: **Nerea Fernández de Larrea**, Centro Nacional de Epidemiología, Instituto de Salud Carlos III, Centro de Investigación Biomédica en Red de Epidemiología y Salud Pública (CIBERESP), Madrid; **Pablo Fernández-Navarro**, Centro Nacional de Epidemiología, Instituto de Salud Carlos III, Centro de Investigación Biomédica en Red de Epidemiología y Salud Pública (CIBERESP), Madrid; **Roberto Pastor-Barriuso**, Centro Nacional de Epidemiología, Instituto de Salud Carlos III, Centro de Investigación Biomédica en Red de Epidemiología y Salud Pública (CIBERESP), Madrid; **Beatriz Pérez-Gómez**, Centro Nacional de Epidemiología, Instituto de Salud Carlos III, Centro de Investigación Biomédica en Red de Epidemiología y Salud Pública (CIBERESP), Madrid; **Marina Pollán**, Directora, Centro Nacional de Epidemiología, Instituto de Salud Carlos III, Centro de Investigación Biomédica en Red de Epidemiología y Salud Pública (CIBERESP), Madrid.

National Center of Microbiology: **Ana Avellón**, Centro Nacional de Microbiología, Instituto de Salud Carlos III, Madrid; **Giovanni Fedele**, Área de Orientación Diagnóstica, Centro Nacional de Microbiología, Instituto de Salud Carlos III, Madrid; **Aurora Fernández-García**, Laboratorio de Referencia e Investigación en Enfermedades Víricas Inmunoprevenibles, Centro Nacional de Microbiología, Instituto de Salud Carlos III, Centro de Investigación Biomédica en Red de Epidemiología y Salud Pública (CIBERESP), Madrid; **Jesús Oteo Iglesias**, Centro Nacional de Microbiología, Instituto de Salud Carlos III, Madrid; **María Teresa Pérez Olmeda**, Laboratorio de Referencia e Investigación en Serología, Centro Nacional de Microbiología, Instituto de Salud Carlos III, Madrid.

National School of Public Health: **Israel Cruz**, Escuela Nacional de Sanidad, Instituto de Salud Carlos III, Madrid; **María Elena Fernández Martínez**, Escuela Nacional de Sanidad, Instituto de Salud Carlos III, Madrid; **Francisco D. Rodríguez-Cabrera**, Escuela Nacional de Sanidad, Instituto de Salud Carlos III, Madrid.

### Harvard T.H. Chan School of Public Health

**Miguel A. Hernán**, Departments of Epidemiology and Biostatistics, Harvard T.H. Chan School of Public Health, Harvard-MIT Division of Health Sciences and Technology, Boston, MA, USA.

### Andalucía

Health Services: **Susana Padrones Fernández**, Dirección de Salud, Distrito Sanitario Sevilla, Sevilla; **José Manuel Rumbao Aguirre**, Dirección Gerencia, Distrito Sanitario Córdoba Guadalquivir, Córdoba.

Laboratory: **José M. Navarro Marí**, Servicio de Microbiología, Hospital Universitario Virgen de las Nieves, Instituto Biosanitario IBs, Granada; **Begoña Palop Borrás**, Servicio de Microbiología, Hospital HRU de Málaga, Málaga; **Ana Belén Pérez Jiménez**, UGC de Microbiología, Hospital Universitario Reina Sofía, Instituto Maimónides de Investigación Biomédica de Córdoba (IMIBIC), Córdoba; **Manuel Rodríguez-Iglesias**, Servicio de Microbiología, Hospital Universitario Puerta del Mar-INIBICA, Cádiz.

### Aragón

Health Services: **Ana María Calvo Gascón**, Centro de Salud de Huesca Rural, Servicio Aragonés de Salud, Huesca; **María Luz Lou Alcaine**, Dirección General de Asistencia Sanitaria, Departamento de Sanidad, Gobierno de Aragón, Zaragoza.

## **Asturias**

Health Services: **Ignacio Donate Suárez**, Jefe de Sección de Ordenación y Gestión, Dirección General de Política y Planificación Sanitarias, Consejería de Salud, Oviedo; **Oscar Suárez Álvarez**, Coordinador de Gestión Asistencial, Dirección de Atención y Evaluación Sanitaria, SESPA Servicio de Salud del Principado de Asturias, Oviedo.

Laboratory: **Mercedes Rodríguez Pérez**, Servicio de Microbiología, Hospital Universitario Central de Asturias (HUCA), Oviedo.

## **Baleares**

Health Services: **Margarita Cases Sanchís**, Coordinadora de Equipos de Atención Primaria, Área de Salud de Menorca, Servei de Salut de les Illes Balears, Menorca; **Carlos Javier Villafáfila Gomila**, Subdirector de Cuidados Asistenciales, Servei de Salut de les Illes Balears, Palma de Mallorca.

Laboratory: **Lluís Carbo Saladrigas**, Servicio de Microbiología, Hospital Mateu Orfila, Mao; **Adoración Hurtado Fernández**, Coordinadora Sección Microbiología, Hospital Can Misses, Ibiza; **Antonio Oliver**, Servicio de Microbiología, Hospital Universitario Son Espases, Instituto de Investigación Sanitaria Illes Balears (IdISBa), Palma de Mallorca.

## **Canarias**

Health Services: **Elías Castro Feliciano**, Gerente de la Empresa GSA 112, Canarias; **María Noemí González Quintana**, Coordinadora Servicio de Urgencias Canario 112, Gestión de Servicios para la Salud y Seguridad en Canarias (GSC), Canarias.

Laboratory: **José María Barrasa Fernández**, Servicio de Análisis Clínicos, Hospital Universitario Nuestra Señora de la Candelaria, Tenerife; **María Araceli Hernández Betancor**, Servicio de Microbiología, Hospital Universitario Insular de Gran Canaria, Gran Canaria; **Melisa Hernández Febles**, Servicio de Microbiología, Hospital General de Gran Canaria Dr. Negrín, Gran Canaria; **Leopoldo Martín Martín**, Servicio de Microbiología, Hospital de La Palma, La Palma.

## **Cantabria**

Health Services: **Luis-Mariano López López**, Director de Enfermería, Gerencia de Atención Primaria de Cantabria, Servicio Cántabro de Salud, Santander; **Teresa Ugarte Miota**, Subdirectora Médico, Gerencia de Atención Primaria de Cantabria, Servicio Cántabro de Salud, Santander.

Laboratory: **Inés De Benito Población**, Servicio de Microbiología, Hospital Sierrallana, Cantabria.

## **Castilla-La Mancha**

Health Services: **María Sagrario Celada Pérez**, Directora de Enfermería Gerencia de Atención Primaria de Toledo, Servicio de Salud de Castilla-La Mancha, Toledo; **María Natalia Vallés Fernández**, Directora General de Atención Primaria, Servicio de Salud de Castilla-La Mancha, Toledo.

## **Castilla y León**

Health Services: **Tomás Maté Enríquez**, Servicio de Calidad y Seguridad de Pacientes, Gerencia Regional de Salud de Castilla y León, Valladolid; **Miguel Villa Arranz**, Dirección Técnica de Tecnologías de la Información y la Comunicación, Gerencia Regional de Salud de Castilla y León, Valladolid.

Laboratory: **Marta Domínguez-Gil González**, Servicio de Microbiología, Hospital Universitario Río Hortega, Valladolid; **Isabel Fernández-Natal**, Servicio de Análisis Clínicos y Microbiología Clínica, Complejo Asistencial Universitario de León, León; **Gregoria Megías Lobón**, Unidad de Microbiología, Complejo Asistencial Universitario de Burgos, Burgos; **Juan Luis Muñoz Bellido**, Servicio de Microbiología, Complejo Asistencial Universitario de Salamanca, Salamanca.

## **Cataluña**

Health Services: **Pilar Ciruela**, Sub-direcció General de Vigilància i Resposta a Emergències de Salut Pública, Departament de Salut, CIBER de Epidemiologia y Salud Pública (CIBERESP), Barcelona; **Ariadna Mas i Casals**, Direcció Assistencial d'Atenció Primària, Institut Català de la Salut, Departament de Salut, Barcelona.

Laboratory: **Maria Doladé Botías**, Jefe de Servicio del Laboratorio de Análisis Clínicos y Bioquímica, Laboratorio Clínic Metropolitana Nord, Hospital Universitari Germans Trias i Pujol, Badalona; **M. Angeles Marcos Maeso**, Servicio de Microbiología, Centro de Diagnóstico Biomédico, Hospital Clínic de Barcelona, Barcelona; **Dúnia Pérez del Campo**, Laboratorio Territorial de Girona, Institut Català de la Salut, Girona.

## **Comunidad Valenciana**

Health Services: **Antonio Félix de Castro**, Médico del Servicio de Atención Sanitaria a las Urgencias y Emergencias, Dirección General de Asistencia Sanitaria, Conselleria de Sanitat Universal i Salut Pública, Valencia; **Ramón Limón Ramírez**, Subdirector General de Evaluación de la Gestión Asistencial, Dirección General de Asistencia Sanitaria, Conselleria de Sanitat Universal i Salut Pública, Valencia.

## **Extremadura**

Health Services: **María Francisca Elías Retamosa**, Técnico Superior de la Subdirección de Atención Primaria del Servicio Extremeño de Salud, Mérida; **Manuela Rubio González**, Subdirectora de Atención Primaria, Dirección General de Asistencia Sanitaria del Servicio Extremeño de Salud, Mérida.

## **Galicia**

Health Services: **María Sinda Blanco Lobeiras**, Subdirectora de Atención Primaria del Sergas, Xunta de Galicia, A Coruña; **Alberto Fuentes Losada**, Secretario General de la Consellería de Sanidade, Xunta de Galicia, Santiago de Compostela.

Laboratory: **Antonio Aguilera**, Servicio de Microbiología, Complejo Hospitalario Universitario de Santiago de Compostela (CHUS), Santiago de Compostela; **German Bou**, Servicio de Microbiología, Hospital Universitario A Coruña, A Coruña.

## **La Rioja**

Health Services: **Yolanda Caro**, Directora Enfermería Hospital San Pedro, Logroño; **Noemí Marauri**, Directora Enfermería Atención Primaria, Logroño.

Laboratory: **Luis Miguel Soria Blanco**, Serología, Hospital San Pedro, Logroño.

## **Madrid**

Health Services: **Isabel del Cura González**, Unidad de Investigación, Gerencia Asistencial Atención Primaria, Departamento Especialidades Médicas y Salud Pública, URJC, Red de Investigación Servicios de Salud en Enfermedades Crónicas (REDISSEC), Madrid; **Montserrat Hernández Pascual**, Gerencia Adjunta Procesos Asistenciales Atención Primaria, Madrid.

Laboratory: **Roberto Alonso Fernández**, Servicio de Microbiología Clínica y Enfermedades Infecciosas, Hospital General Universitario Gregorio Marañón, Madrid; **Paloma Merino-Amador**, Servicio de Microbiología y Parasitología, Hospital Universitario Clínico San Carlos, Madrid.

## **Murcia**

Health Services: **Natalia Cabrera Castro**, Servicio de Epidemiología, Consejería de Salud, IMIB-HCUV Arrixaca, Área IV, Servicio Murciano de Salud, Murcia; **Aurora Tomás Lizcano**, Coordinadora Regional de Enfermería, Dirección General de Asistencia Sanitaria, Servicio Murciano de Salud, Murcia.

Laboratory: **Cristóbal Ramírez Almagro**, Servicio de Microbiología, Hospital General Universitario Santa Lucía, Cartagena; **Manuel Segovia Hernández**, Hospital Clínico Universitario Virgen de la Arrixaca, Universidad de Murcia, Murcia.

## **Navarra**

Health Services: **Nieves Ascunce Elizaga**, Public Health and Labour Institute of Navarre, CIBERESP, Pamplona; **María Ederra Sanz**, Public Health and Labour Institute of Navarre, CIBERESP, Pamplona.

Laboratory: **Carmen Ezpeleta Baquedano**, Servicio de Microbiología Clínica, Complejo Hospitalario de Navarra, Pamplona.

## **País Vasco**

Health Services: **Ana Bustinduy Bascaran**, Dirección General de Osakidetza, Vitoria; **Susana Iglesias Tamayo**, Dirección General de Osakidetza, Vitoria.

Laboratory: **Luis Elorduy Otazua**, Servicio de Microbiología, Hospital Universitario Cruces, Barakaldo.

## **Ceuta**

Health Services: **Rebeca Benarroch Benarroch**, Directora General de Sanidad y Consumo, Consejería de Sanidad, Consumo y Gobernación, Ceuta; **Jesús Lopera Flores**, Director Territorial del Instituto Nacional de Gestión Sanitaria, Ministerio de Sanidad, Ceuta.

## **Melilla**

Health Services: **Antonia Vázquez de la Villa**, Gerente del Área Sanitaria de Melilla, Instituto Nacional de Gestión Sanitaria, Ministerio de Sanidad, Melilla.

## **SUPPLEMENTARY METHODS**

### **Study design**

Participants in the ENE-COVID cohort study were selected through a stratified two-stage sampling from the non-institutionalized Spanish population. Due to the large heterogeneity in SARS-CoV-2 virus circulation across Spanish regions, the first level of stratification consisted of the 50 Spanish provinces and the two autonomous cities (Supplementary Figure 1). Furthermore, since SARS-CoV-2 virus transmission was potentially related to the population density, the second level of stratification corresponded to the municipality size within each province, which was grouped into municipalities of <5,000, 5,000–20,000, 20,000–100,000, and  $\geq 100,000$  inhabitants. Within each stratum defined by province and municipality size, census tracts were selected as first-stage sampling units and households in each census tract as second-stage sampling units. All subjects residing in the household were invited to participate in the study.

### **Sample size determination**

The minimum sample size by province was determined for an underlying crude SARS-CoV-2 seroprevalence of 5% or higher during the study period. Assuming an overall design effect of 2 to account for the variance inflation due to correlations among residents in the same household and households from the same census tract, the effective sample size by province was approximately 600 subjects to estimate a seroprevalence of 5% with a precision of  $\pm 2.5\%$  (50% relative error) at the 95% confidence level. In anticipation of a two-third response rate, the minimum sample to be selected in each province increased to 900 subjects.

The minimum sample size required in the 17 autonomous communities of Spain (first-level administrative division integrating several provinces, Supplementary Figure 1) was determined for the same underlying seroprevalence of at least 5%, but a greater precision in these aggregated estimates of  $\pm 1.65\%$  (33% relative error) at the 95% confidence level. Thus, assuming a design effect of 2 for this survey, the effective sample size by autonomous community was approximately 1,320 subjects, which increased to a minimum selected sample of 1,980 subjects after accounting for a two-third response rate.

### **Allocation of sample to provinces**

A total selected sample of 90,000 subjects was required to achieve the minimum sample size in all provinces and autonomous communities. Given the large heterogeneity in provincial population sizes, the total sample was distributed across provinces according to a compromise allocation. Half of the sample (45,000 subjects) was uniformly assigned to the 52 provinces, a sixth of the sample (15,000 subjects) was uniformly allocated to the 17 autonomous communities and then proportionally to the population size of their provinces, and the remaining third (30,000 subjects) was distributed proportionally to the provincial population size. In this way, the minimum precision required in the estimation of SARS-CoV-2 seroprevalence was achieved in all provinces and single-province autonomous communities, while allowing greater efficiency (that is, lower variance) in multi-province estimates, both at the autonomous and national levels. The resulting allocation of the total sample to provinces is presented in Supplementary Table 1.

### **Within-province sampling**

To ensure a proper representativeness of regions with different population density, the sample allocated to each province was distributed proportionally to the population in the different groups of municipality size (<5,000, 5,000–20,000, 20,000–100,000, or  $\geq 100,000$  inhabitants). In order to optimize field work and avoid excessive sample dispersion, the

subsample corresponding to each municipality size group was selected in two successive stages. First, census tracts (first-stage sampling units) were randomly selected with probability proportional to their size, and then 24 households (second-stage sampling units) were sampled within each selected census tract by simple random sampling without replacement. All subjects residing in the household (analysis units) were invited to participate in the study.

According to the 2019 Continuous Household Survey from the Spanish National Institute of Statistics,<sup>1</sup> the average household size in Spain was 2.50 residents, which would result in an average sample of 60 subjects per census tract. Thus, a total of 1,500 census tracts were selected through the above sampling procedure to reach the required sample of 90,000 subjects. The distribution of the 1,500 census tracts by province and municipality size group is shown in Supplementary Table 2.

#### **SUPPLEMENTARY REFERENCES**

1. Spanish National Institute of Statistics. 2019 Continuous Household Survey. [https://www.ine.es/en/prensa/ech\\_2019\\_en.pdf](https://www.ine.es/en/prensa/ech_2019_en.pdf) (accessed June 12, 2020).



**Supplementary Table 1.** Allocation of total sample to provinces in the ENE-COVID study.

| Autonomous community | Province    | Population* (N) | Allocation (n)      |               |                          | Sample† (n) |       |
|----------------------|-------------|-----------------|---------------------|---------------|--------------------------|-------------|-------|
|                      |             |                 | Uniform by province | Uniform by AC | Proportional by province |             |       |
| Andalucía            | Almería     | 716,820         | 865.4               | 75.2          | 457.3                    | 1,380       |       |
|                      | Cádiz       | 1,240,155       | 865.4               | 130.0         | 791.1                    | 1,800       |       |
|                      | Córdoba     | 782,979         | 865.4               | 82.1          | 499.5                    | 1,440       |       |
|                      | Granada     | 914,678         | 865.4               | 95.9          | 583.5                    | 1,560       |       |
|                      | Huelva      | 521,870         | 865.4               | 54.7          | 332.9                    | 1,260       |       |
|                      | Jaén        | 633,564         | 865.4               | 66.4          | 404.2                    | 1,320       |       |
|                      | Málaga      | 1,661,785       | 865.4               | 174.3         | 1,060.1                  | 2,100       |       |
|                      | Sevilla     | 1,942,389       | 865.4               | 203.7         | 1,239.1                  | 2,340       |       |
| Aragón               | Huesca      | 220,461         | 865.4               | 147.4         | 140.6                    | 1,140       |       |
|                      | Teruel      | 134,137         | 865.4               | 89.7          | 85.6                     | 1,020       |       |
|                      | Zaragoza    | 964,693         | 865.4               | 645.2         | 615.4                    | 2,160       |       |
| Asturias             | Asturias    | 1,022,800       | 865.4               | 882.4         | 652.5                    | 2,400       |       |
| Baleares             | Baleares    | 1,149,460       | 865.4               | 882.4         | 733.3                    | 2,460       |       |
| Canarias             | Las Palmas  | 1,120,406       | 865.4               | 459.1         | 714.8                    | 2,040       |       |
|                      | Tenerife    | 1,032,983       | 865.4               | 423.3         | 659.0                    | 1,980       |       |
| Cantabria            | Cantabria   | 581,078         | 865.4               | 882.4         | 370.7                    | 2,100       |       |
| Castilla-La Mancha   | Albacete    | 388,167         | 865.4               | 168.5         | 247.6                    | 1,260       |       |
|                      | Ciudad Real | 495,761         | 865.4               | 215.2         | 316.3                    | 1,380       |       |
|                      | Cuenca      | 196,329         | 865.4               | 85.2          | 125.2                    | 1,080       |       |
|                      | Guadalajara | 257,762         | 865.4               | 111.9         | 164.4                    | 1,140       |       |
|                      | Toledo      | 694,844         | 865.4               | 301.6         | 443.3                    | 1,620       |       |
| Castilla y León      | Ávila       | 157,640         | 865.4               | 58.0          | 100.6                    | 1,020       |       |
|                      | Burgos      | 356,958         | 865.4               | 131.3         | 227.7                    | 1,200       |       |
|                      | León        | 460,001         | 865.4               | 169.1         | 293.5                    | 1,320       |       |
|                      | Palencia    | 160,980         | 865.4               | 59.2          | 102.7                    | 1,020       |       |
|                      | Salamanca   | 330,119         | 865.4               | 121.4         | 210.6                    | 1,200       |       |
|                      | Segovia     | 153,129         | 865.4               | 56.3          | 97.7                     | 1,020       |       |
|                      | Soria       | 88,636          | 865.4               | 32.6          | 56.5                     | 960         |       |
|                      | Valladolid  | 519,546         | 865.4               | 191.0         | 331.4                    | 1,380       |       |
|                      | Zamora      | 172,539         | 865.4               | 63.4          | 110.1                    | 1,020       |       |
|                      | Cataluña    | Barcelona       | 5,664,579           | 865.4         | 651.2                    | 3,613.7     | 5,160 |
|                      |             | Girona          | 771,044             | 865.4         | 88.6                     | 491.9       | 1,440 |
| Lleida               |             | 434,930         | 865.4               | 50.0          | 277.5                    | 1,200       |       |
| Tarragona            |             | 804,664         | 865.4               | 92.5          | 513.3                    | 1,500       |       |
| Comunidad Valenciana | Alicante    | 1,858,683       | 865.4               | 327.8         | 1,185.7                  | 2,400       |       |
|                      | Castellón   | 579,962         | 865.4               | 102.3         | 370.0                    | 1,320       |       |
|                      | Valencia    | 2,565,124       | 865.4               | 452.3         | 1,636.4                  | 2,940       |       |
| Extremadura          | Badajoz     | 673,559         | 865.4               | 556.6         | 429.7                    | 1,860       |       |
|                      | Cáceres     | 394,151         | 865.4               | 325.7         | 251.4                    | 1,440       |       |
| Galicia              | A Coruña    | 1,119,596       | 865.4               | 365.9         | 714.2                    | 1,980       |       |
|                      | Lugo        | 329,587         | 865.4               | 107.7         | 210.3                    | 1,200       |       |
|                      | Ourense     | 307,651         | 865.4               | 100.6         | 196.3                    | 1,140       |       |
|                      | Pontevedra  | 942,665         | 865.4               | 308.1         | 601.4                    | 1,800       |       |
| La Rioja             | La Rioja    | 316,798         | 865.4               | 882.4         | 202.1                    | 1,980       |       |
| Madrid               | Madrid      | 6,663,394       | 865.4               | 882.4         | 4,250.9                  | 6,000       |       |
| Murcia               | Murcia      | 1,493,898       | 865.4               | 882.4         | 953.0                    | 2,700       |       |
| Navarra              | Navarra     | 654,214         | 865.4               | 882.4         | 417.4                    | 2,160       |       |
|                      | País Vasco  | Álava           | 331,549             | 865.4         | 132.5                    | 211.5       | 1,200 |
|                      |             | Gipuzkoa        | 723,576             | 865.4         | 289.2                    | 461.6       | 1,620 |
|                      | Bizkaia     | 1,152,651       | 865.4               | 460.7         | 735.3                    | 2,040       |       |
| Ceuta                | Ceuta       | 84,777          | 865.4               | 0‡            | 54.1                     | 900         |       |
| Melilla              | Melilla     | 86,487          | 865.4               | 0             | 55.2                     | 900         |       |
| Overall              |             | 47,026,208      | 45,000              | 15,000        | 30,000                   | 90,000      |       |

AC, autonomous community.

\* Population by province as of January 1, 2019 obtained from the Spanish National Institute of Statistics.

† Sample size by province adding up the three allocations and rounded to multiples of 60.

‡ The sample uniformly allocated to the 17 autonomous communities was not assigned to the autonomous cities of Ceuta and Melilla.

**Supplementary Table 2.** Distribution of selected census tracts by province and municipality size group in the ENE-COVID study.\*

| Province    | Population by municipality size group <sup>†</sup> (N) |              |                |           | Total (N) | No. of selected census tracts by municipality size group |              |                |          | Total |
|-------------|--------------------------------------------------------|--------------|----------------|-----------|-----------|----------------------------------------------------------|--------------|----------------|----------|-------|
|             | <5,000                                                 | 5,000–20,000 | 20,000–100,000 | ≥100,000  |           | <5,000                                                   | 5,000–20,000 | 20,000–100,000 | ≥100,000 |       |
| Álava       | 46,261                                                 | 33,514       | 0‡             | 251,774   | 331,549   | 3                                                        | 2            | 0              | 15       | 20    |
| Albacete    | 95,571                                                 | 39,358       | 79,909         | 173,329   | 388,167   | 5                                                        | 2            | 4              | 10       | 21    |
| Alicante    | 105,147                                                | 297,047      | 889,085        | 567,404   | 1,858,683 | 2                                                        | 7            | 19             | 12       | 40    |
| Almería     | 97,696                                                 | 158,358      | 262,233        | 198,533   | 716,820   | 3                                                        | 5            | 9              | 6        | 23    |
| Ávila       | 75,396                                                 | 24,500       | 57,744         | 0         | 157,640   | 8                                                        | 3            | 6              | 0        | 17    |
| Badajoz     | 220,882                                                | 146,348      | 155,627        | 150,702   | 673,559   | 10                                                       | 7            | 7              | 7        | 31    |
| Baleares    | 58,709                                                 | 252,255      | 422,431        | 416,065   | 1,149,460 | 2                                                        | 9            | 15             | 15       | 41    |
| Barcelona   | 261,460                                                | 875,736      | 1,723,578      | 2,803,805 | 5,664,579 | 4                                                        | 13           | 26             | 43       | 86    |
| Burgos      | 100,436                                                | 12,323       | 68,378         | 175,821   | 356,958   | 5                                                        | 1            | 4              | 10       | 20    |
| Cáceres     | 172,340                                                | 85,772       | 136,039        | 0         | 394,151   | 11                                                       | 5            | 8              | 0        | 24    |
| Cádiz       | 27,489                                                 | 160,886      | 601,047        | 450,733   | 1,240,155 | 1                                                        | 4            | 14             | 11       | 30    |
| Castellón   | 81,173                                                 | 103,102      | 223,959        | 171,728   | 579,962   | 3                                                        | 4            | 8              | 7        | 22    |
| Ciudad Real | 95,407                                                 | 182,047      | 218,307        | 0         | 495,761   | 4                                                        | 9            | 10             | 0        | 23    |
| Córdoba     | 118,739                                                | 179,214      | 159,325        | 325,701   | 782,979   | 4                                                        | 5            | 5              | 10       | 24    |
| A Coruña    | 113,347                                                | 344,718      | 415,820        | 245,711   | 1,119,596 | 4                                                        | 10           | 12             | 7        | 33    |
| Cuenca      | 93,297                                                 | 48,342       | 54,690         | 0         | 196,329   | 9                                                        | 4            | 5              | 0        | 18    |
| Girona      | 185,385                                                | 248,263      | 235,544        | 101,852   | 771,044   | 6                                                        | 8            | 7              | 3        | 24    |
| Granada     | 168,225                                                | 321,298      | 192,693        | 232,462   | 914,678   | 5                                                        | 9            | 5              | 7        | 26    |
| Guadalajara | 82,162                                                 | 54,720       | 120,880        | 0         | 257,762   | 6                                                        | 4            | 9              | 0        | 19    |
| Gipuzkoa    | 61,155                                                 | 279,934      | 195,072        | 187,415   | 723,576   | 2                                                        | 11           | 7              | 7        | 27    |
| Huelva      | 99,794                                                 | 141,233      | 137,180        | 143,663   | 521,870   | 4                                                        | 6            | 5              | 6        | 21    |
| Huesca      | 86,294                                                 | 81,035       | 53,132         | 0         | 220,461   | 7                                                        | 7            | 5              | 0        | 19    |
| Jaén        | 141,480                                                | 204,713      | 174,372        | 112,999   | 633,564   | 5                                                        | 7            | 6              | 4        | 22    |
| León        | 160,394                                                | 80,015       | 95,289         | 124,303   | 460,001   | 8                                                        | 4            | 4              | 6        | 22    |
| Lleida      | 158,978                                                | 136,996      | 0              | 138,956   | 434,930   | 7                                                        | 6            | 0              | 7        | 20    |
| La Rioja    | 72,830                                                 | 68,612       | 24,220         | 151,136   | 316,798   | 8                                                        | 7            | 2              | 16       | 33    |
| Lugo        | 116,709                                                | 114,602      | 98,276         | 0         | 329,587   | 7                                                        | 7            | 6              | 0        | 20    |
| Madrid      | 147,979                                                | 454,479      | 1,273,988      | 4,786,948 | 6,663,394 | 2                                                        | 7            | 19             | 72       | 100   |
| Málaga      | 128,615                                                | 108,519      | 706,611        | 718,040   | 1,661,785 | 3                                                        | 2            | 15             | 15       | 35    |
| Murcia      | 13,818                                                 | 225,966      | 586,054        | 668,060   | 1,493,898 | 0                                                        | 7            | 18             | 20       | 45    |
| Navarra     | 208,303                                                | 166,673      | 77,585         | 201,653   | 654,214   | 12                                                       | 9            | 4              | 11       | 36    |

(Table continues)

**Supplementary Table 2** (continued).

| Province   | Population by municipality size group <sup>†</sup> (N) |              |                |            | Total (N)  | No. of selected census tracts by municipality size group |              |                |          | Total |
|------------|--------------------------------------------------------|--------------|----------------|------------|------------|----------------------------------------------------------|--------------|----------------|----------|-------|
|            | <5,000                                                 | 5,000–20,000 | 20,000–100,000 | ≥100,000   |            | <5,000                                                   | 5,000–20,000 | 20,000–100,000 | ≥100,000 |       |
| Ourense    | 111,980                                                | 90,438       | 0              | 105,233    | 307,651    | 7                                                        | 6            | 0              | 6        | 19    |
| Asturias   | 79,013                                                 | 222,717      | 229,604        | 491,466    | 1,022,800  | 3                                                        | 9            | 9              | 19       | 40    |
| Palencia   | 57,000                                                 | 25,568       | 78,412         | 0          | 160,980    | 6                                                        | 3            | 8              | 0        | 17    |
| Las Palmas | 7,485                                                  | 164,260      | 466,089        | 482,572    | 1,120,406  | 0                                                        | 5            | 14             | 15       | 34    |
| Pontevedra | 68,674                                                 | 314,489      | 264,138        | 295,364    | 942,665    | 2                                                        | 10           | 9              | 9        | 30    |
| Salamanca  | 108,255                                                | 77,636       | 0              | 144,228    | 330,119    | 6                                                        | 5            | 0              | 9        | 20    |
| Tenerife   | 70,731                                                 | 151,023      | 446,414        | 364,815    | 1,032,983  | 2                                                        | 5            | 14             | 12       | 33    |
| Cantabria  | 123,461                                                | 145,696      | 139,382        | 172,539    | 581,078    | 8                                                        | 9            | 8              | 10       | 35    |
| Segovia    | 72,229                                                 | 29,226       | 51,674         | 0          | 153,129    | 8                                                        | 3            | 6              | 0        | 17    |
| Sevilla    | 120,306                                                | 476,307      | 523,216        | 822,560    | 1,942,389  | 2                                                        | 10           | 10             | 17       | 39    |
| Soria      | 43,749                                                 | 5,489        | 39,398         | 0          | 88,636     | 8                                                        | 1            | 7              | 0        | 16    |
| Tarragona  | 169,294                                                | 170,308      | 226,174        | 238,888    | 804,664    | 5                                                        | 5            | 7              | 8        | 25    |
| Teruel     | 74,828                                                 | 23,419       | 35,890         | 0          | 134,137    | 9                                                        | 3            | 5              | 0        | 17    |
| Toledo     | 276,023                                                | 195,802      | 223,019        | 0          | 694,844    | 11                                                       | 7            | 9              | 0        | 27    |
| Valencia   | 274,378                                                | 486,662      | 1,009,796      | 794,288    | 2,565,124  | 5                                                        | 10           | 19             | 15       | 49    |
| Valladolid | 97,723                                                 | 59,997       | 63,414         | 298,412    | 519,546    | 4                                                        | 3            | 3              | 13       | 23    |
| Bizkaia    | 112,419                                                | 239,796      | 352,712        | 447,724    | 1,152,651  | 3                                                        | 7            | 11             | 13       | 34    |
| Zamora     | 84,485                                                 | 26,648       | 61,406         | 0          | 172,539    | 8                                                        | 3            | 6              | 0        | 17    |
| Zaragoza   | 152,124                                                | 117,548      | 20,024         | 674,997    | 964,693    | 6                                                        | 4            | 1              | 25       | 36    |
| Ceuta      | 0                                                      | 0            | 84,777         | 0          | 84,777     | 0                                                        | 0            | 15             | 0        | 15    |
| Melilla    | 0                                                      | 0            | 86,487         | 0          | 86,487     | 0                                                        | 0            | 15             | 0        | 15    |
| Overall    | 5,699,628                                              | 8,653,607    | 13,841,094     | 18,831,879 | 47,026,208 | 263                                                      | 299          | 440            | 498      | 1,500 |

\* Within each of the 1,500 selected census tracts, 24 households of an average size of 2.50 residents were sampled to give rise to a total selected sample of 90,000 subjects.

<sup>†</sup> Population as of January 1, 2019 obtained from the Spanish National Institute of Statistics.

<sup>‡</sup> There were 23 empty population strata formed by cross-classifying provinces and municipality size groups.

**Supplementary Table 3.** Diagnostic performance of point-of-care test\* for IgG and IgM antibody detection in serum and blood samples from venipuncture and finger prick in a preliminary validation for the ENE-COVID study.

|                         | IgG antibodies     |              |                    |              | IgM antibodies    |              |                   |              | Total (n) |
|-------------------------|--------------------|--------------|--------------------|--------------|-------------------|--------------|-------------------|--------------|-----------|
|                         | Venipuncture       |              | Finger prick       |              | Venipuncture      |              | Finger prick      |              |           |
|                         | Positive (n)       | Negative (n) | Positive (n)       | Negative (n) | Positive (n)      | Negative (n) | Positive (n)      | Negative (n) |           |
| Serum sample            |                    |              |                    |              |                   |              |                   |              |           |
| PCR-confirmed case†     | 77                 | 20           | NA                 | NA           | 71                | 26           | NA                | NA           | 97        |
| Control‡                | 0                  | 53           | NA                 | NA           | 1                 | 52           | NA                | NA           | 53        |
| Sensitivity, % (95% CI) | 79.4 (70.0–86.9)   |              |                    |              | 73.2 (63.2–81.7)  |              |                   |              |           |
| Specificity, % (95% CI) | 100.0 (93.3–100.0) |              |                    |              | 98.1 (89.9–100.0) |              |                   |              |           |
| Blood sample§           |                    |              |                    |              |                   |              |                   |              |           |
| PCR-confirmed case†     | 46                 | 10           | 46                 | 10           | 36                | 20           | 39                | 17           | 56        |
| Control‡                | 0                  | 103          | 0                  | 103          | 1                 | 102          | 1                 | 102          | 103       |
| Sensitivity, % (95% CI) | 82.1 (69.6–91.1)   |              | 82.1 (69.6–91.1)   |              | 64.3 (50.4–76.6)  |              | 69.6 (55.9–81.2)  |              |           |
| Specificity, % (95% CI) | 100.0 (96.5–100.0) |              | 100.0 (96.5–100.0) |              | 99.0 (94.7–100.0) |              | 99.0 (94.7–100.0) |              |           |

NA, not applicable.

\* COVID-19 IgG/IgM Rapid Test Cassette, Zhejiang Orient Gene Biotech, Co, Ltd., Zhejiang, China (Reference GCCOV-402a).

† PCR-confirmed COVID-19 cases among health personnel from a large hospital in Madrid, Spain, with samples collected at least 10 days after onset of symptoms.

‡ Controls with serum samples collected before December 8, 2019 for diagnosis of other pathogens.

§ Matched venous and finger-prick blood samples from PCR-confirmed COVID-19 cases.

**Supplementary Table 4.** Diagnostic performance of immunoassay\* for IgG antibody detection in serum samples in a preliminary validation for the ENE-COVID study.

|                                 | IgG antibodies     |              | Total (n) |
|---------------------------------|--------------------|--------------|-----------|
|                                 | Positive (n)       | Negative (n) |           |
| PCR-confirmed case†             |                    |              |           |
| ≥10 days from onset of symptoms | 72                 | 10           | 82        |
| ≥14 days from onset of symptoms | 52                 | 6            | 58        |
| Control‡                        | 0                  | 42           | 42        |
| Sensitivity, % (95% CI)         |                    |              |           |
| ≥10 days from onset of symptoms | 87.8 (78.7–94.0)   |              |           |
| ≥14 days from onset of symptoms | 89.7 (78.8–96.1)   |              |           |
| Specificity, % (95% CI)         | 100.0 (91.6–100.0) |              |           |

\* SARS-CoV-2 IgG for use with ARCHITEC, Abbott Laboratories, IL, USA (Reference 06R8620).

† PCR-confirmed COVID-19 cases with serum samples collected at least 10 days after onset of symptoms. Of them, 58 cases provided serum samples at least 14 days after onset of symptoms.

‡ Controls with serum samples collected before December 8, 2019 for diagnosis of other pathogens.

**Supplementary Table 5.** Response rates for point-of-care test and immunoassay by sex, age, and income, ENE-COVID study, April 27–May 11, 2020, Spain.\*

| Sex, age, income     | Eligible sample (n) | Contacted sample (n) | Sample with POC test (n) | Response rate† (%) |           | Sample with assay (n) | Response rate† (%) |           |
|----------------------|---------------------|----------------------|--------------------------|--------------------|-----------|-----------------------|--------------------|-----------|
|                      |                     |                      |                          | Eligible           | Contacted |                       | Eligible           | Contacted |
| Men (years)          |                     |                      |                          |                    |           |                       |                    |           |
| <1                   | 206                 | 187                  | 119                      | 57.8               | 63.6      | 14                    | 6.8                | 7.5       |
| 1–4                  | 1,601               | 1,336                | 864                      | 54.0               | 64.7      | 205                   | 12.8               | 15.3      |
| 5–9                  | 2,477               | 2,140                | 1,528                    | 61.7               | 71.4      | 632                   | 25.5               | 29.5      |
| 10–14                | 2,612               | 2,285                | 1,736                    | 66.5               | 76.0      | 1,187                 | 45.4               | 51.9      |
| 15–19                | 2,384               | 2,083                | 1,594                    | 66.9               | 76.5      | 1,318                 | 55.3               | 63.3      |
| 20–24                | 2,359               | 1,939                | 1,402                    | 59.4               | 72.3      | 1,231                 | 52.2               | 63.5      |
| 25–29                | 2,424               | 1,829                | 1,255                    | 51.8               | 68.6      | 1,104                 | 45.5               | 60.4      |
| 30–34                | 2,666               | 2,047                | 1,435                    | 53.8               | 70.1      | 1,298                 | 48.7               | 63.4      |
| 35–39                | 3,335               | 2,630                | 1,940                    | 58.2               | 73.8      | 1,774                 | 53.2               | 67.5      |
| 40–44                | 4,059               | 3,312                | 2,447                    | 60.3               | 73.9      | 2,241                 | 55.2               | 67.7      |
| 45–49                | 4,056               | 3,403                | 2,609                    | 64.3               | 76.7      | 2,377                 | 58.6               | 69.9      |
| 50–54                | 3,788               | 3,207                | 2,510                    | 66.3               | 78.3      | 2,288                 | 60.4               | 71.3      |
| 55–59                | 3,591               | 3,121                | 2,435                    | 67.8               | 78.0      | 2,251                 | 62.7               | 72.1      |
| 60–64                | 3,241               | 2,807                | 2,251                    | 69.5               | 80.2      | 2,080                 | 64.2               | 74.1      |
| 65–69                | 2,494               | 2,181                | 1,738                    | 69.7               | 79.7      | 1,598                 | 64.1               | 73.3      |
| 70–74                | 2,036               | 1,818                | 1,368                    | 67.2               | 75.2      | 1,272                 | 62.5               | 70.0      |
| 75–79                | 1,601               | 1,404                | 1,009                    | 63.0               | 71.9      | 933                   | 58.3               | 66.5      |
| 80–84                | 1,062               | 910                  | 583                      | 54.9               | 64.1      | 535                   | 50.4               | 58.8      |
| 85–89                | 751                 | 637                  | 374                      | 49.8               | 58.7      | 343                   | 45.7               | 53.8      |
| ≥90                  | 363                 | 292                  | 152                      | 41.9               | 52.1      | 136                   | 37.5               | 46.6      |
| Women (years)        |                     |                      |                          |                    |           |                       |                    |           |
| <1                   | 209                 | 189                  | 121                      | 57.9               | 64.0      | 15                    | 7.2                | 7.9       |
| 1–4                  | 1,582               | 1,316                | 817                      | 51.6               | 62.1      | 174                   | 11.0               | 13.2      |
| 5–9                  | 2,165               | 1,862                | 1,318                    | 60.9               | 70.8      | 550                   | 25.4               | 29.5      |
| 10–14                | 2,504               | 2,206                | 1,692                    | 67.6               | 76.7      | 1,096                 | 43.8               | 49.7      |
| 15–19                | 2,389               | 2,060                | 1,633                    | 68.4               | 79.3      | 1,336                 | 55.9               | 64.9      |
| 20–24                | 2,227               | 1,837                | 1,411                    | 63.4               | 76.8      | 1,248                 | 56.0               | 67.9      |
| 25–29                | 2,398               | 1,851                | 1,363                    | 56.8               | 73.6      | 1,225                 | 51.1               | 66.2      |
| 30–34                | 2,652               | 2,112                | 1,603                    | 60.4               | 75.9      | 1,463                 | 55.2               | 69.3      |
| 35–39                | 3,199               | 2,678                | 2,072                    | 64.8               | 77.4      | 1,910                 | 59.7               | 71.3      |
| 40–44                | 3,999               | 3,410                | 2,698                    | 67.5               | 79.1      | 2,495                 | 62.4               | 73.2      |
| 45–49                | 3,925               | 3,404                | 2,766                    | 70.5               | 81.3      | 2,557                 | 65.1               | 75.1      |
| 50–54                | 3,803               | 3,372                | 2,769                    | 72.8               | 82.1      | 2,536                 | 66.7               | 75.2      |
| 55–59                | 3,758               | 3,366                | 2,780                    | 74.0               | 82.6      | 2,577                 | 68.6               | 76.6      |
| 60–64                | 3,197               | 2,862                | 2,349                    | 73.5               | 82.1      | 2,174                 | 68.0               | 76.0      |
| 65–69                | 2,686               | 2,366                | 1,854                    | 69.0               | 78.4      | 1,712                 | 63.7               | 72.4      |
| 70–74                | 2,428               | 2,165                | 1,583                    | 65.2               | 73.1      | 1,464                 | 60.3               | 67.6      |
| 75–79                | 1,886               | 1,665                | 1,166                    | 61.8               | 70.0      | 1,073                 | 56.9               | 64.4      |
| 80–84                | 1,561               | 1,358                | 848                      | 54.3               | 62.4      | 763                   | 48.9               | 56.2      |
| 85–89                | 1,265               | 1,064                | 599                      | 47.4               | 56.3      | 529                   | 41.8               | 49.7      |
| ≥90                  | 720                 | 544                  | 284                      | 39.4               | 52.2      | 244                   | 33.9               | 44.9      |
| Census tract income‡ |                     |                      |                          |                    |           |                       |                    |           |
| <5th                 | 5,070               | 4,165                | 2,865                    | 56.5               | 68.8      | 2,382                 | 47.0               | 57.2      |
| 5–25th               | 21,370              | 17,953               | 13,278                   | 62.1               | 74.0      | 11,229                | 52.5               | 62.5      |
| 25–50th              | 23,975              | 20,421               | 15,356                   | 64.1               | 75.2      | 13,096                | 54.6               | 64.1      |
| 50–75th              | 21,650              | 18,540               | 14,074                   | 65.0               | 75.9      | 11,804                | 54.5               | 63.7      |
| 75–95th              | 18,499              | 15,888               | 12,183                   | 65.9               | 76.7      | 10,583                | 57.2               | 66.6      |
| ≥95th                | 5,095               | 4,288                | 3,319                    | 65.1               | 77.4      | 2,864                 | 56.2               | 66.8      |

POC, point of care.

\* Response rates among 95,659 eligible subjects with available age.

† Response rates for point-of-care test and immunoassay among eligible and contacted subjects.

‡ Categories based on percentiles from province-specific distributions of census tract average income in 2017.

**Supplementary Table 6.** Seroprevalence of SARS-CoV-2 by province, ENE-COVID study, April 27–May 11, 2020, Spain.

| Autonomous community | Province    | No. of participants | Point-of-care test, % (95% CI) | No. of participants | Immunoassay, % (95% CI) | Both tests positive,* % (95% CI) | Either test positive,* % (95% CI) |
|----------------------|-------------|---------------------|--------------------------------|---------------------|-------------------------|----------------------------------|-----------------------------------|
| <b>North</b>         |             |                     |                                |                     |                         |                                  |                                   |
| Asturias             | Asturias    | 1,550               | 1.9 (1.3–2.8)                  | 1,454               | 1.4 (0.8–2.3)           | 1.1 (0.6–1.8)                    | 2.2 (1.5–3.2)                     |
| Cantabria            | Cantabria   | 1,504               | 3.6 (2.3–5.7)                  | 1,354               | 2.9 (1.9–4.6)           | 2.2 (1.2–3.9)                    | 4.3 (2.9–6.4)                     |
| Galicia              | A Coruña    | 1,275               | 1.8 (1.1–2.9)                  | 1,058               | 1.0 (0.5–1.8)           | 0.5 (0.2–1.2)                    | 2.3 (1.3–3.9)                     |
|                      | Lugo        | 813                 | 2.2 (1.1–4.4)                  | 672                 | 1.1 (0.5–2.4)           | 0.8 (0.3–2.3)                    | 2.7 (1.3–5.5)                     |
|                      | Ourense     | 686                 | 2.9 (1.9–4.5)                  | 492                 | 0.7 (0.2–2.8)           | 0.3 (0.0–2.3)                    | 2.8 (1.5–5.1)                     |
|                      | Pontevedra  | 1,296               | 2.2 (1.7–3.0)                  | 883                 | 1.5 (0.7–3.0)           | 1.0 (0.4–2.6)                    | 3.0 (2.0–4.5)                     |
| La Rioja             | La Rioja    | 1,323               | 3.4 (2.5–4.7)                  | 1,088               | 3.5 (2.1–5.7)           | 2.1 (1.3–3.5)                    | 4.9 (3.4–7.0)                     |
| Navarra              | Navarra     | 1,744               | 5.7 (4.3–7.5)                  | 1,587               | 4.6 (3.2–6.5)           | 3.8 (2.7–5.5)                    | 6.9 (5.2–9.2)                     |
| País Vasco           | Álava       | 692                 | 7.4 (5.5–9.9)                  | 595                 | 4.4 (2.9–6.8)           | 3.4 (2.0–5.7)                    | 9.4 (7.0–12.5)                    |
|                      | Gipuzkoa    | 951                 | 2.5 (1.4–4.5)                  | 878                 | 2.4 (1.2–4.7)           | 1.6 (0.7–3.9)                    | 3.0 (1.7–5.0)                     |
|                      | Bizkaia     | 1,195               | 4.0 (2.6–6.0)                  | 1,042               | 2.9 (1.6–5.0)           | 2.2 (1.1–4.3)                    | 4.8 (3.1–7.1)                     |
| <b>Centre</b>        |             |                     |                                |                     |                         |                                  |                                   |
| Castilla-La Mancha   | Albacete    | 1,058               | 11.7 (8.8–15.3)                | 925                 | 12.8 (9.6–17.1)         | 10.3 (7.2–14.7)                  | 14.7 (11.6–18.5)                  |
|                      | Ciudad Real | 1,163               | 10.2 (7.9–13.2)                | 1,058               | 11.0 (8.1–14.7)         | 9.5 (7.1–12.6)                   | 12.3 (9.3–16.2)                   |
|                      | Cuenca      | 851                 | 13.2 (10.4–16.6)               | 760                 | 13.6 (10.2–17.8)        | 11.3 (8.5–14.7)                  | 15.3 (11.6–20.0)                  |
|                      | Guadalajara | 814                 | 10.4 (7.5–14.3)                | 681                 | 10.0 (6.6–14.9)         | 8.5 (5.3–13.3)                   | 12.5 (9.1–17.1)                   |
|                      | Toledo      | 1,179               | 8.9 (5.4–14.4)                 | 970                 | 11.1 (7.0–17.2)         | 9.5 (5.6–15.7)                   | 11.8 (7.6–17.9)                   |
| Castilla y León      | Ávila       | 667                 | 6.6 (4.6–9.4)                  | 595                 | 5.7 (4.0–8.1)           | 5.2 (3.4–7.8)                    | 7.6 (5.5–10.3)                    |
|                      | Burgos      | 887                 | 4.9 (3.2–7.5)                  | 824                 | 4.6 (2.8–7.5)           | 3.6 (2.1–6.2)                    | 6.2 (4.0–9.6)                     |
|                      | León        | 886                 | 6.1 (4.0–9.2)                  | 700                 | 6.0 (3.4–10.4)          | 4.9 (2.7–8.8)                    | 8.0 (5.1–12.1)                    |
|                      | Palencia    | 740                 | 8.0 (4.7–13.2)                 | 657                 | 4.3 (2.4–7.6)           | 3.7 (2.0–6.8)                    | 6.9 (4.8–9.9)                     |
|                      | Salamanca   | 809                 | 7.5 (5.2–10.7)                 | 760                 | 7.9 (5.5–11.2)          | 6.6 (4.5–9.5)                    | 8.9 (6.2–12.5)                    |
|                      | Segovia     | 548                 | 11.8 (8.9–15.4)                | 474                 | 12.4 (8.2–18.4)         | 11.4 (7.4–17.1)                  | 14.2 (10.3–19.2)                  |
|                      | Soria       | 707                 | 14.4 (11.6–17.8)               | 647                 | 13.0 (10.0–16.7)        | 11.1 (8.2–14.7)                  | 17.6 (14.2–21.6)                  |
|                      | Valladolid  | 1,084               | 5.9 (3.9–8.6)                  | 999                 | 4.4 (2.9–6.6)           | 3.7 (2.4–5.6)                    | 6.4 (4.4–9.0)                     |
|                      | Zamora      | 651                 | 6.8 (4.1–11.2)                 | 500                 | 3.9 (1.6–9.6)           | 3.8 (1.5–9.5)                    | 7.5 (4.0–13.7)                    |
|                      | Madrid      | Madrid              | 3,186                          | 11.3 (9.8–13.0)     | 2,489                   | 11.5 (9.9–13.3)                  | 9.5 (8.0–11.2)                    |

(Table continues)

**Supplementary Table 6** (continued).

| <b>Autonomous community</b> | <b>Province</b> | <b>No. of participants</b> | <b>Point-of-care test, % (95% CI)</b> | <b>No. of participants</b> | <b>Immunoassay, % (95% CI)</b> | <b>Both tests positive,* % (95% CI)</b> | <b>Either test positive,* % (95% CI)</b> |
|-----------------------------|-----------------|----------------------------|---------------------------------------|----------------------------|--------------------------------|-----------------------------------------|------------------------------------------|
| <b>East</b>                 |                 |                            |                                       |                            |                                |                                         |                                          |
| Aragón                      | Huesca          | 733                        | 4.4 (2.3–8.3)                         | 647                        | 4.0 (1.7–9.1)                  | 3.2 (1.4–7.5)                           | 4.9 (2.4–9.6)                            |
|                             | Teruel          | 688                        | 3.3 (1.7–6.2)                         | 629                        | 2.4 (1.2–4.7)                  | 1.6 (0.7–3.7)                           | 4.2 (2.4–7.2)                            |
|                             | Zaragoza        | 1,331                      | 4.9 (3.6–6.6)                         | 1,199                      | 3.2 (2.1–4.9)                  | 2.4 (1.4–4.2)                           | 5.9 (4.5–7.7)                            |
| Cataluña                    | Barcelona       | 3,696                      | 7.0 (5.7–8.6)                         | 3,375                      | 6.8 (5.6–8.3)                  | 5.9 (4.7–7.3)                           | 8.2 (6.8–10.0)                           |
|                             | Girona          | 905                        | 2.6 (1.8–3.8)                         | 792                        | 1.8 (1.1–3.0)                  | 0.8 (0.4–1.6)                           | 3.9 (2.5–6.1)                            |
|                             | Lleida          | 710                        | 3.8 (2.4–6.0)                         | 637                        | 2.6 (1.5–4.6)                  | 2.3 (1.2–4.2)                           | 4.4 (2.7–6.9)                            |
|                             | Tarragona       | 1,012                      | 1.4 (0.8–2.4)                         | 936                        | 1.1 (0.5–2.6)                  | 0.6 (0.2–2.4)                           | 2.1 (1.3–3.3)                            |
| Comunidad Valenciana        | Alicante        | 1,572                      | 2.6 (1.9–3.6)                         | 1,335                      | 2.4 (1.4–4.0)                  | 1.6 (0.9–2.8)                           | 3.5 (2.4–5.0)                            |
|                             | Castellón       | 803                        | 2.9 (1.5–5.8)                         | 740                        | 2.5 (0.9–6.5)                  | 1.8 (0.5–5.9)                           | 4.0 (2.1–7.5)                            |
|                             | Valencia        | 1,913                      | 2.1 (1.4–3.3)                         | 1,706                      | 1.3 (0.6–2.6)                  | 1.0 (0.4–2.5)                           | 2.5 (1.6–4.0)                            |
| Murcia                      | Murcia          | 1,391                      | 1.4 (0.8–2.4)                         | 1,233                      | 1.6 (0.8–3.1)                  | 0.9 (0.4–2.0)                           | 2.1 (1.3–3.6)                            |
| <b>South/southwest</b>      |                 |                            |                                       |                            |                                |                                         |                                          |
| Andalucía                   | Almería         | 986                        | 1.6 (0.8–3.3)                         | 646                        | 1.8 (0.9–3.5)                  | 1.3 (0.5–3.2)                           | 2.7 (1.4–4.8)                            |
|                             | Cádiz           | 1,385                      | 1.6 (1.0–2.6)                         | 1,252                      | 1.5 (0.8–2.9)                  | 0.8 (0.3–1.7)                           | 2.4 (1.5–3.7)                            |
|                             | Córdoba         | 1,117                      | 2.6 (1.6–4.1)                         | 884                        | 2.0 (0.7–5.4)                  | 1.8 (0.6–5.4)                           | 3.7 (1.7–7.8)                            |
|                             | Granada         | 1,024                      | 2.8 (1.7–4.4)                         | 743                        | 2.3 (1.3–4.2)                  | 1.2 (0.5–2.7)                           | 3.7 (2.3–5.9)                            |
|                             | Huelva          | 930                        | 1.2 (0.5–2.7)                         | 827                        | 0.5 (0.2–1.6)                  | 0.2 (0.0–1.7)                           | 1.4 (0.6–3.2)                            |
|                             | Jaén            | 1,062                      | 4.0 (2.7–5.7)                         | 863                        | 2.5 (1.3–5.0)                  | 1.7 (0.7–3.9)                           | 4.2 (2.7–6.4)                            |
|                             | Málaga          | 1,464                      | 4.0 (2.6–5.9)                         | 1,228                      | 3.4 (2.1–5.6)                  | 2.9 (1.6–4.9)                           | 5.2 (3.5–7.8)                            |
|                             | Sevilla         | 1,805                      | 2.3 (1.5–3.3)                         | 1,043                      | 1.9 (0.9–3.7)                  | 1.1 (0.4–2.8)                           | 3.4 (2.3–4.9)                            |
| Extremadura                 | Badajoz         | 1,583                      | 2.6 (1.7–4.1)                         | 1,458                      | 2.2 (1.4–3.3)                  | 1.0 (0.5–1.9)                           | 3.8 (2.7–5.3)                            |
|                             | Cáceres         | 1,201                      | 3.0 (1.8–5.0)                         | 1,132                      | 4.0 (2.3–6.7)                  | 2.1 (1.2–3.7)                           | 4.7 (2.8–7.8)                            |
| <b>Islands</b>              |                 |                            |                                       |                            |                                |                                         |                                          |
| Baleares                    | Baleares        | 1,372                      | 2.3 (1.6–3.5)                         | 1,176                      | 1.8 (1.1–3.0)                  | 1.1 (0.5–2.2)                           | 3.2 (2.2–4.7)                            |
| Canarias                    | Las Palmas      | 1,244                      | 1.9 (1.2–2.9)                         | 1,149                      | 0.7 (0.3–1.3)                  | 0.2 (0.1–0.6)                           | 2.4 (1.6–3.7)                            |
|                             | Tenerife        | 1,124                      | 2.7 (1.2–6.0)                         | 996                        | 2.3 (1.3–4.1)                  | 1.4 (0.5–3.5)                           | 4.0 (2.3–6.8)                            |
| <b>Autonomous cities</b>    |                 |                            |                                       |                            |                                |                                         |                                          |
| Ceuta                       | Ceuta           | 838                        | 1.2 (0.6–2.3)                         | 503                        | 2.3 (1.0–5.0)                  | 1.3 (0.3–5.0)                           | 2.8 (1.5–5.3)                            |
| Melilla                     | Melilla         | 927                        | 1.8 (1.2–2.8)                         | 687                        | 0.9 (0.5–1.7)                  | 0.3 (0.1–1.1)                           | 2.7 (1.6–4.5)                            |

\* Seroprevalence with both tests positive and either test positive among participants with available results from point-of-care test and immunoassay.



**Supplementary Table 7.** Seroprevalence of SARS-CoV-2 by age group, ENE-COVID study, April 27–May 11, 2020, Spain.

| Age (years) | No. of participants | Point-of-care test, % (95% CI) | No. of participants | Immunoassay, % (95% CI) | Both tests positive,* % (95% CI) | Either test positive,* % (95% CI) |
|-------------|---------------------|--------------------------------|---------------------|-------------------------|----------------------------------|-----------------------------------|
| <1          | 240                 | 1.1 (0.3–3.5)                  | 29                  | 0.0 (0.0–11.9)          | 0.0 (0.0–11.9)                   | 0.0 (0.0–11.9)                    |
| 1–4         | 1,681               | 2.1 (1.3–3.4)                  | 379                 | 3.5 (1.7–6.8)           | 2.6 (1.2–5.5)                    | 4.0 (2.1–7.4)                     |
| 5–9         | 2,846               | 3.1 (2.2–4.2)                  | 1,182               | 3.6 (2.3–5.7)           | 2.9 (1.7–4.9)                    | 4.8 (3.3–7.0)                     |
| 10–14       | 3,428               | 4.0 (3.1–5.0)                  | 2,283               | 4.1 (3.1–5.5)           | 3.5 (2.5–4.7)                    | 5.4 (4.2–7.0)                     |
| 15–19       | 3,227               | 3.7 (2.9–4.8)                  | 2,654               | 3.8 (2.8–5.0)           | 3.1 (2.3–4.3)                    | 4.6 (3.6–5.9)                     |
| 20–24       | 2,813               | 4.5 (3.5–5.7)                  | 2,479               | 5.5 (4.3–7.0)           | 3.7 (2.7–4.9)                    | 6.6 (5.3–8.1)                     |
| 25–29       | 2,618               | 4.7 (3.6–6.2)                  | 2,329               | 5.4 (4.1–7.1)           | 3.9 (2.8–5.5)                    | 6.5 (5.1–8.3)                     |
| 30–34       | 3,038               | 4.0 (3.1–5.2)                  | 2,761               | 4.3 (3.3–5.4)           | 3.3 (2.4–4.4)                    | 5.1 (4.1–6.4)                     |
| 35–39       | 4,012               | 4.7 (3.8–5.8)                  | 3,684               | 4.8 (3.9–6.0)           | 3.6 (2.8–4.6)                    | 6.0 (5.0–7.3)                     |
| 40–44       | 5,145               | 5.2 (4.4–6.1)                  | 4,736               | 4.7 (3.9–5.7)           | 3.8 (3.0–4.6)                    | 6.2 (5.3–7.3)                     |
| 45–49       | 5,375               | 5.8 (4.9–6.8)                  | 4,934               | 5.1 (4.2–6.2)           | 4.1 (3.3–5.2)                    | 7.1 (6.1–8.3)                     |
| 50–54       | 5,279               | 5.8 (4.9–6.9)                  | 4,824               | 4.9 (4.0–5.9)           | 4.2 (3.3–5.2)                    | 6.6 (5.5–7.7)                     |
| 55–59       | 5,215               | 5.9 (5.0–6.9)                  | 4,828               | 4.9 (4.1–5.9)           | 3.9 (3.1–4.9)                    | 6.9 (5.9–8.0)                     |
| 60–64       | 4,600               | 5.8 (4.8–6.9)                  | 4,254               | 4.1 (3.3–5.2)           | 3.5 (2.7–4.6)                    | 6.3 (5.3–7.5)                     |
| 65–69       | 3,592               | 6.1 (5.0–7.4)                  | 3,310               | 4.9 (3.8–6.3)           | 4.1 (3.1–5.3)                    | 7.2 (5.9–8.7)                     |
| 70–74       | 2,951               | 6.6 (5.4–8.1)                  | 2,736               | 4.6 (3.5–5.9)           | 3.8 (2.8–5.1)                    | 6.8 (5.6–8.3)                     |
| 75–79       | 2,175               | 5.7 (4.5–7.4)                  | 2,006               | 4.2 (3.0–5.9)           | 3.4 (2.4–5.0)                    | 6.5 (5.0–8.5)                     |
| 80–84       | 1,431               | 5.3 (3.8–7.3)                  | 1,298               | 5.0 (3.4–7.4)           | 3.9 (2.4–6.1)                    | 6.7 (4.8–9.1)                     |
| 85–89       | 973                 | 6.0 (4.2–8.7)                  | 872                 | 3.6 (2.1–6.1)           | 3.4 (2.0–6.0)                    | 6.7 (4.5–9.8)                     |
| ≥90         | 436                 | 5.4 (3.0–9.5)                  | 380                 | 2.4 (1.1–5.3)           | 1.9 (0.8–4.8)                    | 4.8 (2.6–8.8)                     |

\* Seroprevalence with both tests positive and either test positive among participants with available results from point-of-care test and immunoassay.

**Supplementary Table 8.** Seroprevalence of SARS-CoV-2 by general characteristics, ENE-COVID study, April 27–May 11, 2020, Spain.

| Characteristic                    | No. of participants | Both tests positive,*<br>% (95% CI) | Either test positive,*<br>% (95% CI) |
|-----------------------------------|---------------------|-------------------------------------|--------------------------------------|
| Overall                           | 51,958              | 3.7 (3.3–4.0)                       | 6.2 (5.8–6.6)                        |
| Sex                               |                     |                                     |                                      |
| Men                               | 24,817              | 3.6 (3.3–4.0)                       | 6.2 (5.7–6.7)                        |
| Women                             | 27,141              | 3.7 (3.3–4.1)                       | 6.2 (5.7–6.7)                        |
| Nationality                       |                     |                                     |                                      |
| Spaniard                          | 49,520              | 3.6 (3.3–4.0)                       | 6.2 (5.8–6.6)                        |
| Other                             | 2,178               | 4.8 (3.5–6.6)                       | 7.1 (5.6–9.1)                        |
| Occupation†                       |                     |                                     |                                      |
| Active worker                     | 23,763              | 4.3 (3.9–4.8)                       | 6.9 (6.4–7.5)                        |
| Unemployed                        | 3,981               | 2.2 (1.7–2.9)                       | 4.8 (3.8–6.0)                        |
| Student                           | 3,060               | 3.8 (2.8–5.0)                       | 6.0 (4.9–7.3)                        |
| Retired                           | 10,932              | 3.7 (3.1–4.5)                       | 6.7 (5.9–7.5)                        |
| Permanent/temporal disability     | 1,342               | 2.6 (1.5–4.4)                       | 4.9 (3.5–6.9)                        |
| House person                      | 3,033               | 2.4 (1.7–3.3)                       | 5.5 (4.5–6.8)                        |
| Unpaid social work                | 42                  | 3.1 (0.7–12.1)                      | 4.5 (1.4–13.6)                       |
| Other                             | 839                 | 2.3 (1.4–3.8)                       | 5.4 (3.7–7.7)                        |
| Occupation sector‡                |                     |                                     |                                      |
| Telecommuting                     | 10,947              | 4.9 (4.3–5.5)                       | 7.5 (6.8–8.3)                        |
| Retail                            | 1,515               | 3.8 (2.5–5.8)                       | 5.7 (4.2–7.8)                        |
| Transport                         | 731                 | 4.5 (2.7–7.6)                       | 7.5 (5.1–11.0)                       |
| Police/firefighters/public safety | 589                 | 5.2 (3.1–8.5)                       | 7.6 (5.2–11.2)                       |
| Cleaning                          | 748                 | 3.0 (1.7–5.3)                       | 5.7 (3.8–8.4)                        |
| Healthcare                        | 1,048               | 8.3 (6.1–11.2)                      | 11.7 (9.2–14.7)                      |
| Nursing home/other social work    | 947                 | 6.6 (4.7–9.2)                       | 9.5 (7.2–12.6)                       |
| Home caregiver                    | 372                 | 2.5 (0.9–6.7)                       | 5.8 (3.1–10.6)                       |
| Other                             | 6,865               | 2.6 (2.1–3.2)                       | 5.0 (4.4–5.8)                        |
| Household size (residents)        |                     |                                     |                                      |
| 1                                 | 4,456               | 3.2 (2.6–4.1)                       | 5.5 (4.6–6.4)                        |
| 2                                 | 12,894              | 4.1 (3.5–4.8)                       | 6.7 (6.0–7.6)                        |
| 3–5                               | 32,140              | 3.6 (3.2–4.1)                       | 6.2 (5.7–6.7)                        |
| ≥6                                | 2,468               | 2.5 (1.5–4.1)                       | 4.7 (3.4–6.4)                        |
| Census tract income§              |                     |                                     |                                      |
| <5th percentile                   | 2,382               | 3.5 (2.2–5.5)                       | 6.6 (4.5–9.5)                        |
| 5–25th percentile                 | 11,229              | 3.9 (3.1–4.9)                       | 6.0 (5.1–7.1)                        |
| 25–50th percentile                | 13,096              | 3.6 (2.9–4.5)                       | 6.2 (5.3–7.3)                        |
| 50–75th percentile                | 11,804              | 3.3 (2.7–4.2)                       | 5.9 (5.1–6.8)                        |
| 75–95th percentile                | 10,583              | 3.7 (2.9–4.6)                       | 6.2 (5.3–7.3)                        |
| ≥95th percentile                  | 2,864               | 4.6 (3.4–6.4)                       | 7.3 (5.6–9.4)                        |
| Municipality size (inhabitants)   |                     |                                     |                                      |
| ≥100,000                          | 15,974              | 4.9 (4.3–5.6)                       | 7.7 (7.0–8.5)                        |
| 20,000–100,000                    | 15,553              | 3.0 (2.6–3.6)                       | 5.3 (4.8–6.0)                        |
| 5,000–20,000                      | 10,727              | 2.4 (1.9–3.0)                       | 4.7 (4.0–5.5)                        |
| <5,000                            | 9,704               | 2.9 (2.2–3.9)                       | 5.3 (4.4–6.5)                        |

\* Seroprevalence with both tests positive and either test positive among participants with available results from point-of-care test and immunoassay.

† Among participants aged 17 years or older.

‡ Among active workers during lockdown.

§ Categories based on percentiles from province-specific distributions of census tract average income in 2017.

**Supplementary Table 9.** Seroprevalence of SARS-CoV-2 by self-reported clinical characteristics, ENE-COVID study, April 27–May 11, 2020, Spain.

| <b>Characteristic</b>                 | <b>No. of participants</b> | <b>Both tests positive,*<br/>% (95% CI)</b> | <b>Either test positive,*<br/>% (95% CI)</b> |
|---------------------------------------|----------------------------|---------------------------------------------|----------------------------------------------|
| Symptoms compatible with COVID-19†    |                            |                                             |                                              |
| Asymptomatic                          | 34,016                     | 1.2 (1.1–1.5)                               | 3.4 (3.1–3.7)                                |
| Paucisymptomatic                      | 10,669                     | 3.0 (2.5–3.5)                               | 5.5 (4.9–6.1)                                |
| Symptomatic                           | 7,273                      | 15.3 (13.8–16.8)                            | 19.3 (17.7–21.0)                             |
| ≤14 days ago                          | 2,155                      | 11.9 (9.9–14.3)                             | 16.3 (14.0–18.9)                             |
| >14 days ago                          | 5,118                      | 16.6 (14.8–18.5)                            | 20.5 (18.6–22.5)                             |
| PCR status                            |                            |                                             |                                              |
| Never done                            | 50,594                     | 3.2 (2.9–3.6)                               | 5.8 (5.4–6.2)                                |
| Negative                              | 1,134                      | 6.5 (4.7–9.1)                               | 9.4 (7.2–12.0)                               |
| Positive (≤14 days ago)               | 31                         | 50.2 (27.0–73.4)                            | 66.4 (42.0–84.3)                             |
| Positive (>14 days ago)               | 195                        | 87.6 (81.1–92.1)                            | 91.8 (86.3–95.3)                             |
| Contact with confirmed case           |                            |                                             |                                              |
| No contact                            | 47,385                     | 2.6 (2.3–2.9)                               | 4.9 (4.6–5.3)                                |
| Household member                      | 860                        | 32.8 (27.5–38.5)                            | 38.9 (33.2–44.9)                             |
| Non-cohabitating family member/friend | 1,284                      | 11.4 (9.2–14.1)                             | 16.4 (13.6–19.7)                             |
| Co-worker                             | 1,461                      | 8.1 (6.4–10.3)                              | 12.6 (10.3–15.3)                             |
| Cleaning staff/housemaid/caregiver    | 78                         | 8.5 (4.0–17.3)                              | 13.8 (8.1–22.7)                              |
| Client‡                               | 888                        | 9.0 (6.6–12.2)                              | 12.8 (10.1–16.2)                             |
| Contact with symptomatic person       |                            |                                             |                                              |
| No contact                            | 42,894                     | 1.9 (1.7–2.2)                               | 4.2 (3.9–4.5)                                |
| Household member                      | 3,728                      | 13.9 (12.1–16.1)                            | 17.4 (15.3–19.7)                             |
| Non-cohabitating family member/friend | 2,037                      | 10.5 (8.5–13.0)                             | 14.9 (12.6–17.5)                             |
| Co-worker                             | 2,221                      | 8.5 (7.0–10.4)                              | 12.7 (10.8–14.9)                             |
| Cleaning staff/housemaid/caregiver    | 96                         | 4.4 (2.0–9.8)                               | 7.3 (3.6–14.2)                               |
| Client‡                               | 980                        | 8.2 (6.0–11.1)                              | 11.7 (9.3–14.8)                              |

\* Seroprevalence with both tests positive and either test positive among participants with available results from point-of-care test and immunoassay.

† Asymptomatic (no symptoms), paucisymptomatic (1–2 symptoms without anosmia), and symptomatic (anosmia or ≥3 symptoms among fever, chills, severe tiredness, sore throat, cough, shortness of breath, headache, and nausea/vomiting/diarrhea).

‡ Client or patient if health worker.

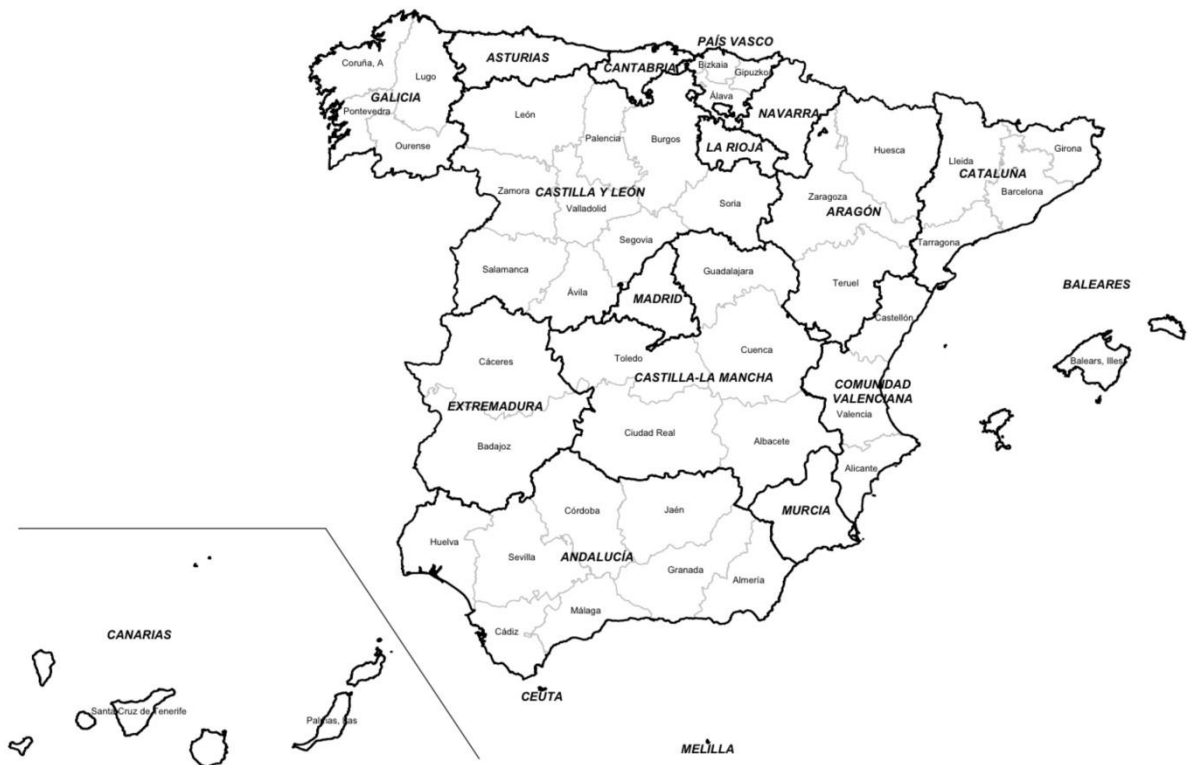

**Supplementary Figure 1.** Provinces, autonomous communities, and autonomous cities (Ceuta, Melilla) of Spain.

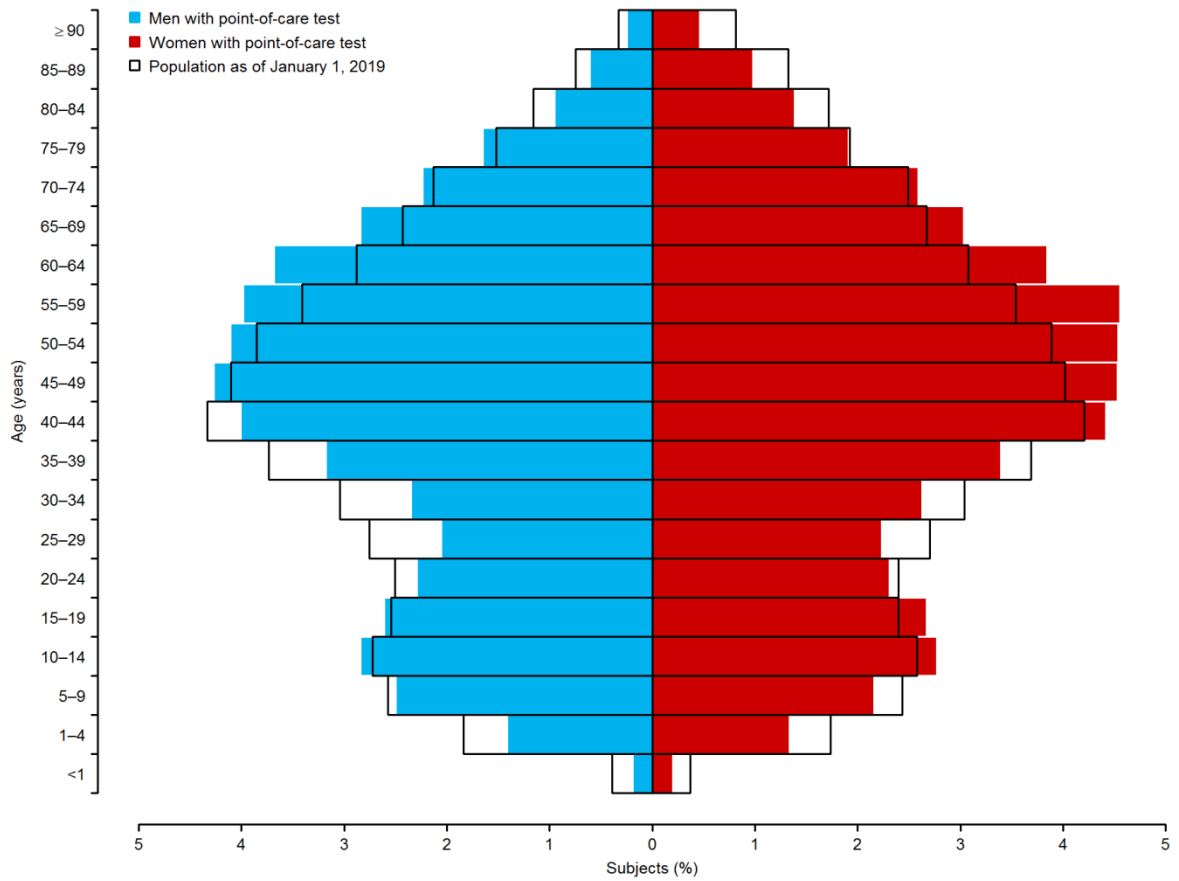

**Supplementary Figure 2.** Sex and age distribution of participants with point-of-care test compared with the Spanish population, ENE-COVID study, April 27–May 11, 2020, Spain.

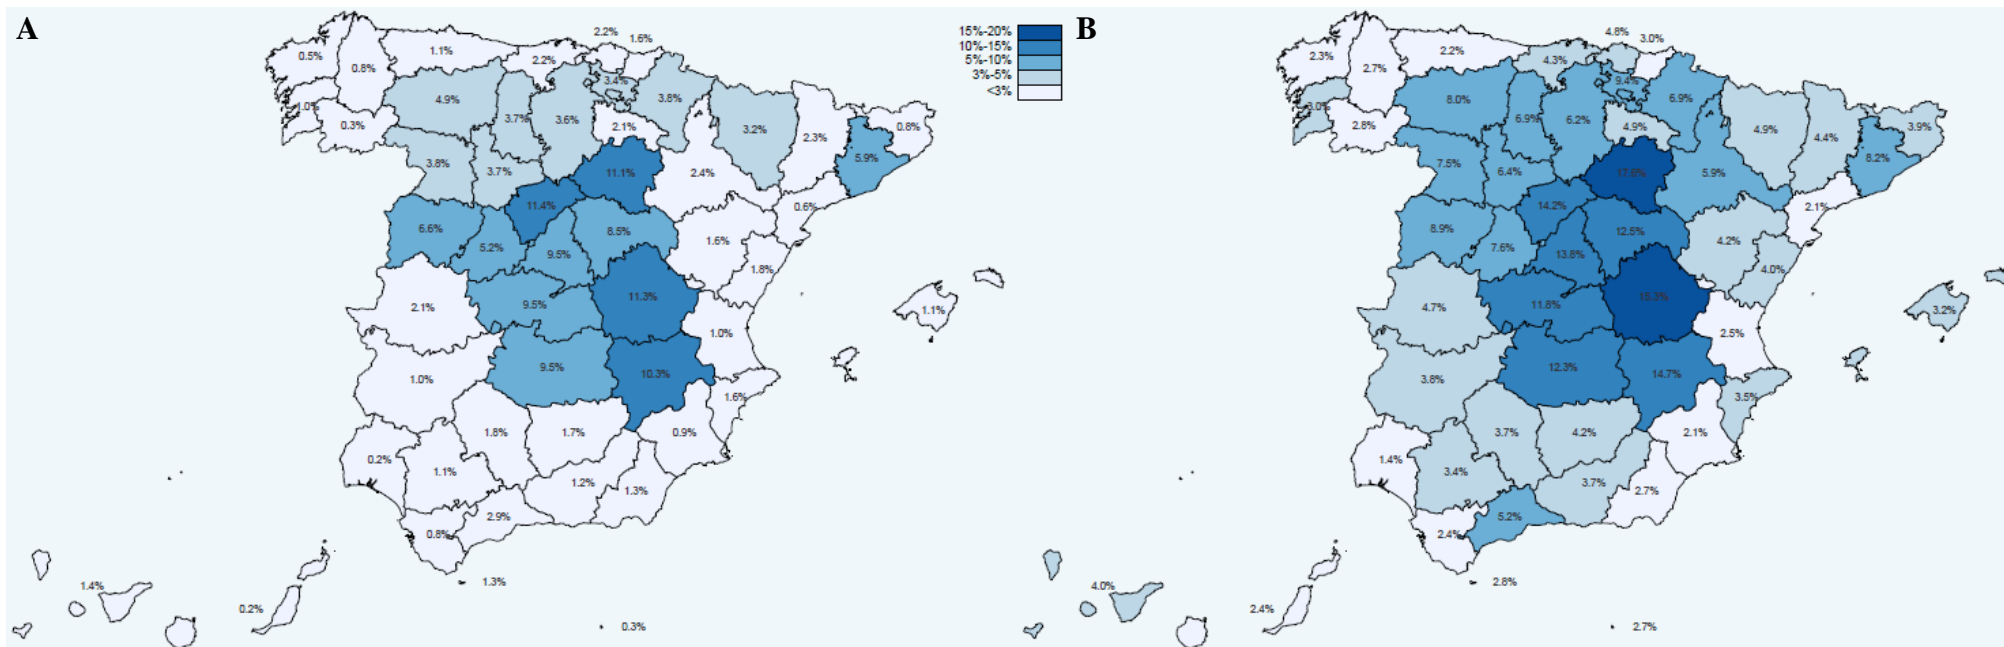

**Supplementary Figure 3.** Seroprevalence of SARS-CoV-2 by province with both point-of-care test and immunoassay positive (A) and either point-of-care test or immunoassay positive (B), ENE-COVID study, April 27–May 11, 2020, Spain.

Seroprevalence among 51,958 participants with available results from both point-of-care test and immunoassay.
